# Supplementary material for: Changes in Cave Sedimentation Mechanisms During the Late Quaternary: An Example From the Lower Cerovačka Cave, Croatia
Source: Frontiers journal article supplement (doi:10.3389/feart.2021.672229), 2021-06-30
Supplement: Data_Sheet_2.PDF [file Data_Sheet_2.PDF]

To open the 3D pdf file, Adobe Acrobat Reader DC needs to be installed on your computer.

On the upper left corner click **Options**, and then: **Trust this document one time only** or **always**.

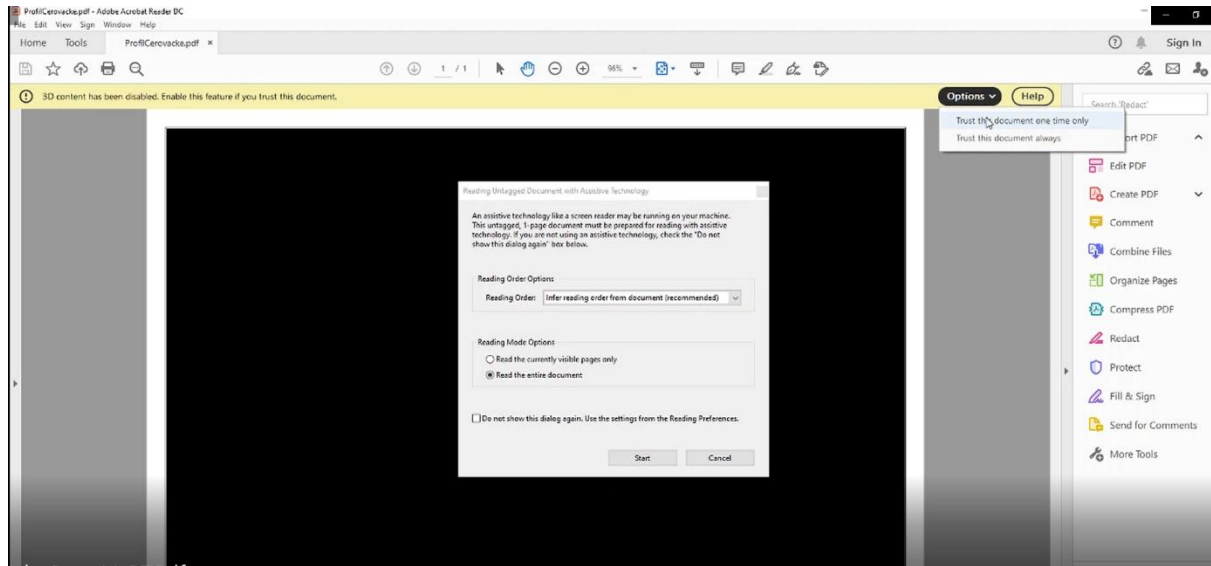

Click **Start** in the lower window.

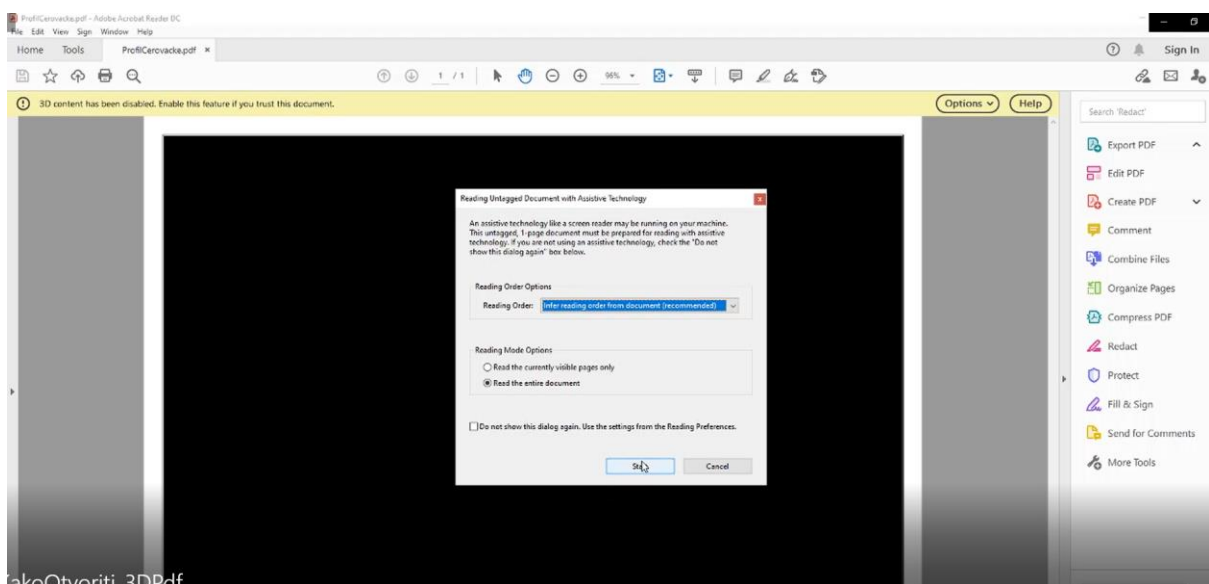

Make one left-click in the black space in the middle of the screen.

Use left-click to rotate, and right-click or scroll to zoom the model.
